# Supplementary material for: A Notch-dependent transcriptional mechanism controls expression of temporal patterning factors in Drosophila medulla
Source: bioRxiv preprint, doi:10.1101/2021.10.29.466469, version 4 (2022-07-16)
Supplement: Supplementary File 1 [file 466469_file08.docx]

Sequence of fragment deleted by CRISPR-Cas9 targeting the u8772 220bp enhancer (5’ -> 3’)

2L: 3817278-3817675

cgcctcgcccaaatgcatttgaatcgagtggtgagcgatagttttcacatgttttgttcgagcattaattccgtttaaatgatttccgcaacagatttgagctttgcacgtaatcaagtggaaatgaatttgaccaacacaagaggtttatacacacatcacattttctgcctttatgtttttgcggtgtcccattagtttgattgtttcgaaggccactgagccgtgaaaaatatcagagaaataaaaatcgaaataccgaaatgagctggttttttgttagcgaaagtgcagatttttcaggactcgcaaagggatgtgattgaagatcttcaggatatttcagcacatgcatcgatatttgtcccaaactggaagtcattgacccagttactttt

Sequence of fragment deleted by CRISPR-Cas9 targeting the d5778 850bp enhancer

2L: 3842548-3844867

aagtccttgggtaatacgaggagaacaaaaacaagtaaggataatattttcataggcaaaacaattgtggttgtgcaaggaagtgacttttgggaacgggaggcacttgcagctgcccaagtatatccaccatatcccatatcctttttccgagtccctaatttcctgggaaagctttcggtgcagttcgccagccaaaacacttgagcacttaaaaaggcgcattaactcgagtctggtttccgattccgatttcgcttcctcctgccaacttatttctatatcttctccctttgtgccctgtgtgtgtgaaacaaaaacgtttgtttcaatacgttggcttcgtgcattttacggtgttgggaaacagacgaaatggactcattgattccaattgactgatttcaattgatgttaagtgtctgccacagtcgcagccgcaaattcagtggcacaactccgtcgcagccaaatgccatttgcttttcacatccaggtcgaacggcgttgccttgttgactttgtttttgctactcattgccgcgatttgggttaggcatggggtatgtgcgcactgtgggaactttggattactcagatgaaacagcatttaggacactatgcagctggaaagataaactagttgatagctactcatttactcatttactacttactactaatttaatgcatttttaacaactttaagctacacaagccaaaactaatgggtattttatagtcctatttaacccctttaacgaatgcatccttttaccttttttggtcacggcagctgaactctgccctttcgttgggggtgactcctccctcccgtactccctccctccctcccctccctctccgcgccacagtcgaccttgtcaagtaccttgttagctgttgggcaaatgtgccacacaagtggctcacatcagcgggatcgaaaataaaaagcgaaacgcatcgagaacttcccaagaaaacggcgagtcaaagttgagaaaacgctgcttccgtttaattgacaattgaacccgaacccggaccgaactcctggagaatatgtacgctgctatccggcatagtcgagtcatcccaagtcatgcgcttaatttcccgtttaaaacgccattcattcaattaagcgaatgaatttgtggcacggcagacgacagcagaagtttttttttcctgaaagaagactatcatcattgagatgccccgagatctctcggctggagctccagatccgatgcgatccaatcggatgagatgagatcgtatggaataggatggagcatgcgggtctctggggtctgtggtctttcgatctttttgtctgcccccgggggctttcttcagtaatcagacgcgggtcaaaatatttaccacttgaccctattgatttaattaaatagtttcaagacattcaactgtttgttggccgcgcaaaatgaatttcgtgtgcgagataactcagatacagtagctgcagtagctgatcaactatctttcagatatgcgcacatttctctctcgttttgtctccgagctgtcaacacagattccaaactgcagacgtgttaattaacgacagagttaactaattgttgttagcaaaatattttcgtaattcgatactaaattcgagttccgctcaacttgcttgcttgtgggcttttgtgttgaacagcacaagacctcaaggaacagtggaacagtgcttcaaagtggggaaaaacatcttataatctagatcatttttaaatttcataaagtctttgattgaaataaaacgtttaagtgaggcaagttcgtattattattagagaaagataactaacctttttggtttatatttaggtcttgaagcactgttcctgctgttttcgctgttgactgcccatgaaacgcttaactgcgagtggcaattggatacctggctgaatccaaatacgaatcttaatctgaatctgcgagtctttgtggccaatgaacacggcagcggcacaacacaaaaacttagcagatactcatgttttatttgtgcatttcgcgcgcgcgttccacttggaaatgctctgtggcaccaaaaggagccactgatgtccaaaatcaaaatggtttcagttcgccggggcaatgcctaaaatgtttctttgtttttgtgttccctgttggcaagcggcgcttcaacagatacagatagatgtgaaatttgttgctaaaaaaaaaagtaagtccataaatcaaatgcctttaaatattcatgagtcaggacaatgtgtgaacaagcgaaaggagctgggatatcgaa
